# Supplementary material
Source: Royal Society of Chemistry journal article supplement (doi:10.1039/d6gc00587j)
Supplement: d6gc00587j1.pdf [file d6gc00587j1.pdf]

**Promotion of protein utilization from corn by-product via calcium-dependent  
growth stimulation of *Streptomyces* sp. SCUT-3**

Fu-Gen Zhang<sup>a1</sup>, Chu-Yan Liang<sup>a1</sup>, Ming-Shu Zhang<sup>a</sup>, Lei Wu<sup>a</sup>, Can Qin<sup>a</sup>, Zhi-Wei Li<sup>c</sup>, Jun Dai<sup>a</sup>, Wei  
Huang<sup>a</sup>, Jun-Jin Deng<sup>b\*</sup>, and Xiao-Chun Luo<sup>a\*</sup>

<sup>a</sup> School of Biology and Biological Engineering, South China University of Technology, Guangzhou  
Higher Education Mega Center, Panyu District, Guangzhou, Guangdong 510006, P. R. China

<sup>b</sup> Agro-biological Gene Research Center, Guangdong Academy of Agricultural Sciences, State Key  
Laboratory of Swine and Poultry Breeding Industry, Guangdong Provincial Key Laboratory of Crop  
Germplasm Resources Conservation and Utilization, Guangzhou 510640, China

<sup>c</sup> GuangZhou XiaoChun Biotechnology Company, Ltd., Room 1001-A056, No. 190 Kaitai Avenue,  
Huangpu District, Guangzhou 510535, China

\* Corresponding authors. E-Mail addresses: dengjunjin@agrogene.ac.cn (J.-J. Deng),

xcluo@scut.edu.cn (X.-C. Luo)

<sup>1</sup> These authors contributed equally

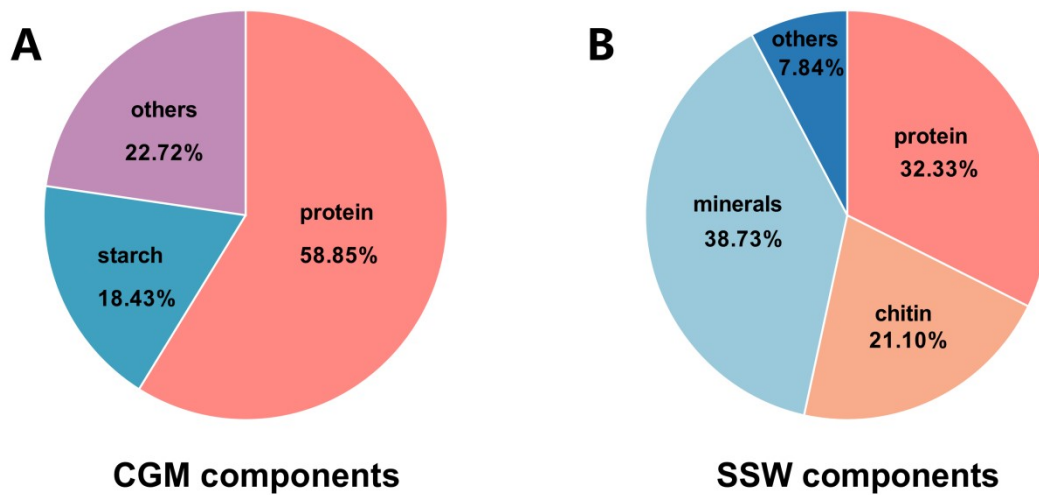

**Fig. S1.** (A) CGM nutritional composition (on a dry weight basis). (B) SSW nutritional composition (on a dry weight basis).

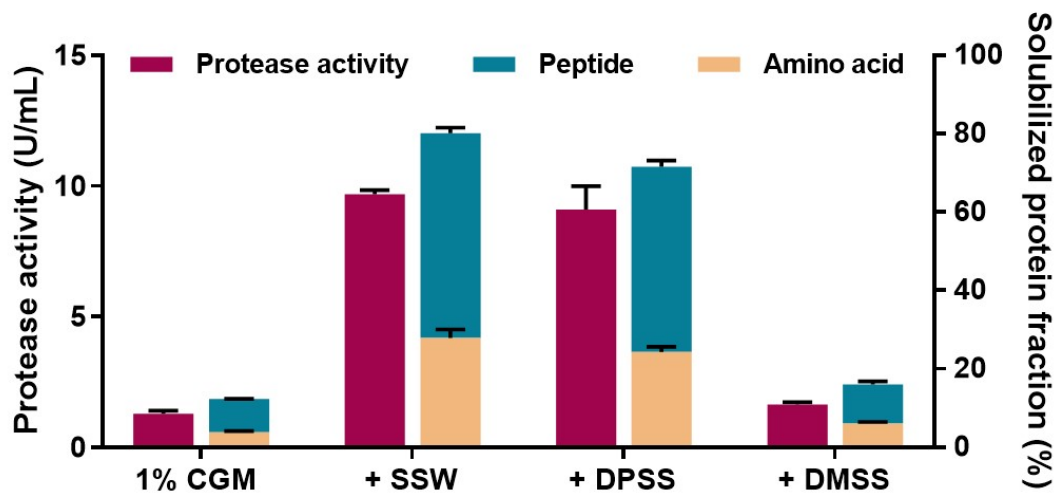

**Fig. S2.** Protease activity and solubilized protein fraction of SCUT-3 in 1% CGM fermentation at 24 h, supplemented with or without 0.2% SSW, DPSS, or DMSS individually. Data are presented as mean  $\pm$  SD of three independent experiments (n = 3).

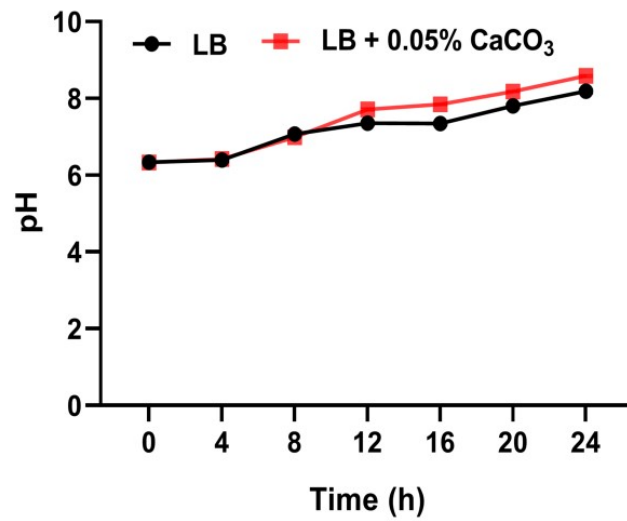

**Fig. S3.** pH changes during SCUT-3 cultivation in LB medium supplemented with or without 0.05% CaCO<sub>3</sub>. Data are presented as mean  $\pm$  SD of three independent experiments (n = 3).

**Table S1.** Five putative calcium-binding proteins in the genome of SCUT-3.

| Subcellular location | Assembly    | MW       | Family    |
|----------------------|-------------|----------|-----------|
|                      | GQS52_00140 | 8.1 kDa  |           |
| Intracellular        | GQS52_14050 | 21.2 kDa | EFh       |
|                      | GQS52_24710 | 7.6 kDa  |           |
| Membrane             | GQS52_16545 | 4.2 kDa  | Excalibur |
| Cytoplasm            | GQS52_18945 | 30.4 kDa | DUF5707   |

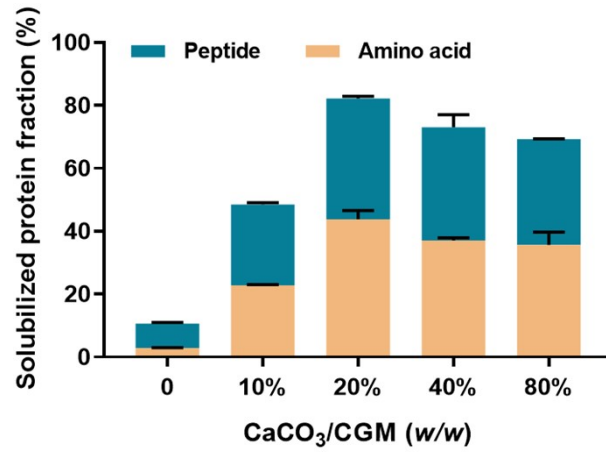

**Fig. S4.** Effects of different CaCO<sub>3</sub> addition ratios on CGM solid-state fermentation under the optimized SSW-CGM conditions. Data are presented as mean ± SD of three independent experiments (n = 3).

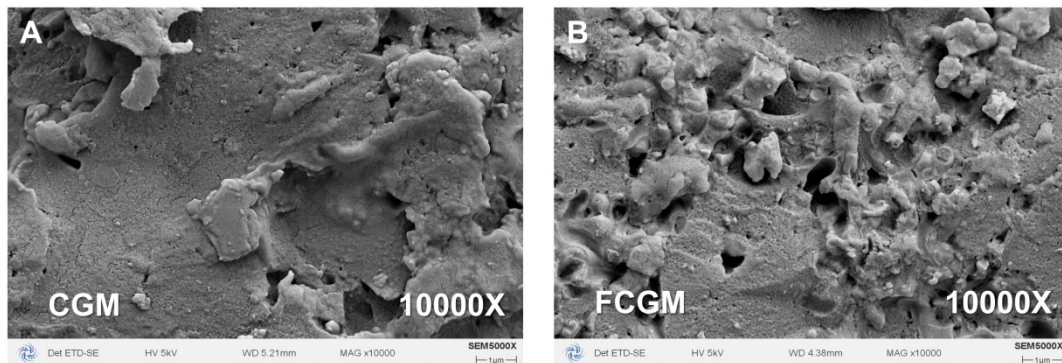

**Fig. S5.** The microscopic structure of CGM and FCGM. (A-B) SEM micrographs of CGM and FCGM at 10000× magnification, respectively.

**Table S2.** Total amino acid profiles of CGM and FCGM.

| Amino acids                                                                                    | Abbreviation | Proportion (%) |       | Product (mg/g) |        |
|------------------------------------------------------------------------------------------------|--------------|----------------|-------|----------------|--------|
|                                                                                                |              | CGM            | FCGM  | CGM            | FCGM   |
| Aspartic acid                                                                                  | Asp          | 5.94           | 6.69  | 35.78          | 40.51  |
| Threonine                                                                                      | Thr          | 3.33           | 4.71  | 20.08          | 28.52  |
| Serine                                                                                         | Ser          | 5.06           | 4.91  | 30.49          | 29.76  |
| Glutamic acid                                                                                  | Glu          | 21.18          | 22.7  | 127.69         | 137.44 |
| Proline                                                                                        | Pro          | 8.64           | 8.27  | 52.11          | 50.09  |
| Glycine                                                                                        | Gly          | 2.99           | 3.32  | 18.04          | 20.13  |
| Alanine                                                                                        | Ala          | 8.65           | 7.53  | 52.13          | 45.58  |
| Cysteine                                                                                       | Cys          | 0.27           | 0.47  | 1.64           | 2.82   |
| Valine                                                                                         | Val          | 4.38           | 5.28  | 26.42          | 31.98  |
| Methionine                                                                                     | Met          | 2.34           | 1.58  | 14.13          | 9.54   |
| Isoleucine                                                                                     | Ile          | 3.65           | 3.50  | 22.00          | 21.17  |
| Leucine                                                                                        | Leu          | 15.65          | 13.96 | 94.36          | 84.55  |
| Tyrosine                                                                                       | Tyr          | 4.77           | 6.08  | 28.76          | 36.80  |
| Phenylalanine                                                                                  | Phe          | 5.94           | 4.39  | 35.78          | 26.60  |
| Lysine                                                                                         | Lys          | 1.85           | 1.89  | 11.15          | 11.45  |
| Histidine                                                                                      | His          | 2.19           | 1.61  | 13.17          | 9.75   |
| Arginine                                                                                       | Arg          | 3.16           | 3.12  | 19.05          | 18.87  |
| Total                                                                                          |              |                |       | 602.77         | 605.55 |
| Essential and semi-essential amino acids<br>(Met, Val, Lys, Ile, Phe, Leu, Thr, Arg, Tyr, His) |              | 47.26          | 46.11 | 284.89         | 279.22 |
| Umami amino acids (Glu, Asp)                                                                   |              | 27.12          | 29.39 | 163.47         | 177.94 |
| Sweet amino acids (Gly, Ala, Thr, Pro, Ser)                                                    |              | 28.67          | 28.75 | 172.84         | 174.08 |
| Branched chain amino acids (Leu, Ile, Val)                                                     |              | 23.69          | 22.74 | 142.77         | 137.69 |

**Table S3.** Inventory of procedures in different methods to process 10,000 tonnes CGM yearly.

| Process                                                 | Agent                     | Pretreatment                                    | CGM treatment                           |
|---------------------------------------------------------|---------------------------|-------------------------------------------------|-----------------------------------------|
| <i>B. subtilis</i><br>MTCC5480 solid-state fermentation | Procedure                 | Sterilization                                   | Fermentation                            |
|                                                         | Chemicals/enzymes         | -                                               | 107 tonnes glucose<br>50 tonnes peptone |
|                                                         | Reaction conditions       | 4600 m <sup>3</sup> Water; 121 °C/1 atm/20min   | 36 °C/1 atm/5 d                         |
|                                                         | Energy exhausted          | 644,000 kWh                                     | 337,000 kWh                             |
|                                                         | Waste water               | -                                               | -                                       |
|                                                         | CO <sub>2</sub> emissions | 96,342 kg                                       | 50,415 kg                               |
| <i>S. SCUT-3</i> solid-state fermentation               | Procedure                 | Sterilization                                   | Fermentation                            |
|                                                         | Chemicals/enzymes         | -                                               | 2000 tonnes SSW                         |
|                                                         | Reaction conditions       | 18,000 m <sup>3</sup> Water; 100 °C/1 atm/20min | 40 °C/1 atm/3 d                         |
|                                                         | Energy exhausted          | 1,732,500 kWh                                   | 513,000 kWh                             |
|                                                         | Waste water               | -                                               | -                                       |
|                                                         | CO <sub>2</sub> emissions | 259,182 kg                                      | 76,745 kg                               |

**Table S4.** Equivalence factors for the land use types.

| Area type    | Equivalence factor |
|--------------|--------------------|
| Fossil land  | 1.26               |
| Pasture land | 0.46               |
| Forest area  | 1.26               |
| Arable land  | 2.51               |

## **Supplementary Methods**

### **S1 Analysis of the basic components of CGM and SSW**

#### **S1.1 Determination of crude protein content of CGM**

The protein content in corn gluten meal (CGM) was determined using the Kjeldahl method in accordance with the standard GB/T 5009.5–2016, employing a semi-automatic KDN-80C analyzer (Tuopo-Yunnong, Zhejiang, China). A precisely weighed amount of dried CGM sample was placed in a digestion tube, to which anhydrous potassium sulfate, copper sulfate, and concentrated sulfuric acid were added. The sample was digested at 450 °C for 2 h. After distillation of the digest, the released ammonia was absorbed in a 20 g/L boric acid solution, and the crude protein content was calculated by titrating the absorbed ammonia with a standard hydrochloric acid solution.

#### **S1.2 Determination of starch content of CGM**

The starch content in CGM was determined using a starch assay kit (Solarbio, Beijing, China) according to the manufacturer's instructions. Soluble sugars and starch were first extracted from the sample using 80% ethanol. Subsequently, starch was hydrolyzed into glucose by acid hydrolysis. The glucose content was then quantified using the anthrone colorimetric method, and the starch content was calculated accordingly.

#### **S1.3 Determination of the basic components of SSW**

Dried SSW powder (8 g) underwent alkaline hydrolysis with 40 mL NaOH (1 M) at 90 °C for 4 hours. The supernatant was collected for protein quantification via the Kjeldahl method using a KDN-80C analyzer (Tuopo-Yunnong, China). The residual solids were then washed to neutrality using distilled water until eluent pH reached 7.0. Subsequently, acid demineralization was performed with 40 ml HCl (1 M) at 40 °C for 6 h to determine the mineral content. The resulting precipitate was then immersed in 95% (v/v) ethanol for 4 h. After washing and drying, the remaining weight was recorded as the weight of chitin.

### **S2 Preparation of deproteinated and demineralized shrimp shells**

The raw shrimp shells were washed thoroughly with deionized water to remove impurities and dried at 65 °C to constant weight. The dried shells were then ground into a fine powder (sieved to 0.3 mm) for subsequent treatments.

Detailed methods are provided in S1.3. Briefly, after deproteinization with NaOH, the residue was washed to neutral pH and dried at 65 °C to constant weight to obtain deproteinized shrimp shell (DPSS). DPSS was further subjected to HCl demineralization, followed by washing to neutral pH with distilled water and drying at 65 °C to constant weight to obtain deproteinized and demineralized shrimp shell (DMSS).

### **S3. Preparation of shrimp shell protein hydrolysate (SSPH)**

SSPH was prepared by direct enzymatic hydrolysis using alkaline protease. Briefly, shrimp shell powder was suspended in water at 10% (*w/v*), and alkaline protease was added at 1500 U/g substrate. The hydrolysis reaction was conducted at pH 8.0 and 50 °C for 6 h, followed by enzyme inactivation in a boiling water bath for 10 min. The mixture was then centrifuged at 8000 ×g for 5 min at room temperature, and the supernatant, rich in soluble peptides and free amino acids, was collected as SSPH.
